# Supplementary material for: Anastomosis Groups and Mycovirome of Rhizoctonia Isolates Causing Sugar Beet Root and Crown Rot and Their Sensitivity to Flutolanil, Thifluzamide, and Pencycuron
Source: MDPI journal article supplement (doi:10.3390/jof9050545), 2023-05-09
Supplement: s1 [file s1]

**Table S2.** *Rhizoctonia* isolates recovered from sugar beet roots with the symptoms of root and crown rot in China from 2009 to 2016.

| Isolate code | Sampling site <sup>z</sup>                      | Year | AG <sup>y</sup> | GenBank accession number |
|--------------|-------------------------------------------------|------|-----------------|--------------------------|
| R1           | Suihua city, Heilongjiang province              | 2009 | A               | KR259886                 |
| R2           | Suihua city, Heilongjiang province              | 2009 | A               | NM729020                 |
| R3           | Suihua city, Heilongjiang province              | 2009 | A               | NM729021                 |
| R4           | Heihe city, Heilongjiang province               | 2009 | 4HGI            | KR259914                 |
| R5           | Heihe city, Heilongjiang province               | 2009 | 2-2IIIB         | NM729023                 |
| R6           | Heihe city, Heilongjiang province               | 2009 | 2-2IIIB         | KR259889                 |
| R7           | Qiqihar city, Heilongjiang province             | 2009 | 4HGII           | KR259934                 |
| R8           | Suihua city, Heilongjiang province              | 2009 | 2-2IIIB         | NM729024                 |
| R9           | Ulanqab city, Inner Mongolia autonomous region  | 2009 | 2-2IIIB         | KR259890                 |
| R10          | Ulanqab city, Inner Mongolia autonomous region  | 2009 | 2-2IIIB         | NM729025                 |
| R11          | Ulanqab city, Inner Mongolia autonomous region  | 2009 | 2-2IIIB         | NM729026                 |
| R12          | Ulanqab city, Inner Mongolia autonomous region  | 2009 | 2-2IIIB         | NM729027                 |
| R13          | Ulanqab city, Inner Mongolia autonomous region  | 2009 | 2-2IIIB         | KR259891                 |
| R15          | Ulanqab city, Inner Mongolia autonomous region  | 2009 | 2-2IIIB         | NM729028                 |
| R16          | Ulanqab city, Inner Mongolia autonomous region  | 2009 | 2-2IIIB         | NM729029                 |
| R17          | Chifeng city, Inner Mongolia autonomous region  | 2009 | 4HGI            | KR259916                 |
| R18          | Chifeng city, Inner Mongolia autonomous region  | 2009 | 4HGI            | NM729118                 |
| R19          | Chifeng city, Inner Mongolia autonomous region  | 2009 | 2-2IIIB         | KR259892                 |
| R20          | Chifeng city, Inner Mongolia autonomous region  | 2009 | 4HGI            | NM729119                 |
| R21          | Ulanqab city, Inner Mongolia autonomous region  | 2009 | 2-2IIIB         | NM729031                 |
| R23          | Qiqihar city, Heilongjiang province             | 2009 | 4HGI            | NM729032                 |
| R24          | Qiqihar city, Heilongjiang province             | 2010 | 4HGI            | NM729120                 |
| R25          | Qiqihar city, Heilongjiang province             | 2010 | 4HGI            | NM729121                 |
| R26          | Mudanjiang city, Heilongjiang province          | 2010 | 4HGI            | KR259918                 |
| R28          | Ulanqab city, Inner Mongolia autonomous region  | 2010 | 2-2IIIB         | KR259893                 |
| R29          | Ulanqab city, Inner Mongolia autonomous region  | 2010 | 2-2IIIB         | NM729033                 |
| R30          | Ulanqab city, Inner Mongolia autonomous region  | 2010 | 2-2IIIB         | NM729034                 |
| R32          | Datong city, Shanxi province                    | 2010 | 2-2IIIB         | KR259894                 |
| R33          | Datong city, Shanxi province                    | 2010 | 2-2IIIB         | NM729035                 |
| R35          | Haidian district, Beijing municipality          | 2010 | 2-2IV           | KR259911                 |
| R36          | Changji city, Xinjiang Uygur autonomous region  | 2010 | 2-2IIIB         | KR259895                 |
| R37          | Bayingol city, Xinjiang Uygur autonomous region | 2010 | 4HGI            | NM729122                 |
| R38          | Suihua city, Heilongjiang province              | 2010 | 2-2IIIB         | KR259896                 |
| R39          | Qiqihar city, Heilongjiang province             | 2010 | 4HGII           | KR259935                 |
| R40          | Qiqihar city, Heilongjiang province             | 2010 | A               | NM729022                 |
| R41          | Baotou city, Inner Mongolia autonomous region   | 2010 | 2-2IIIB         | KR259897                 |
| R42          | Chifeng city, Inner Mongolia autonomous region  | 2010 | 2-2IIIB         | NM729036                 |
| RR2          | Suihua city, Heilongjiang province              | 2011 | A               | KR259888                 |
| RR5          | Zhangye city, Gansu province                    | 2011 | 4HGII           | KR259939                 |
| RR6          | Zhangye city, Gansu province                    | 2011 | 4HGI            | KR259924                 |

**Table S2.** (Continued from preceding page).

| <b>Isolate<br/>code</b> | <b>Sampling site <sup>z</sup></b>              | <b>Year</b> | <b>AG <sup>y</sup></b> | <b>GenBank<br/>accession number</b> |
|-------------------------|------------------------------------------------|-------------|------------------------|-------------------------------------|
| RR7                     | Suihua city, Heilongjiang province             | 2011        | 4HGII                  | KR259940                            |
| RR8                     | Qiqihar city, Heilongjiang province            | 2011        | 4HGI                   | KR259925                            |
| RR11                    | Ulanqab city, Inner Mongolia autonomous region | 2011        | 2-2IIIB                | KR259903                            |
| RR13                    | Siping city, Jilin province                    | 2011        | 2-2IIIB                | KR259904                            |
| RR16                    | Ulanqab city, Inner Mongolia autonomous region | 2011        | 2-2IIIB                | NM729109                            |
| RR17                    | Ulanqab city, Inner Mongolia autonomous region | 2011        | 2-2IIIB                | KR259906                            |
| RR18                    | Ili city, Xinjiang Uygur autonomous region     | 2011        | 4HGI                   | NM729176                            |
| RR20                    | Ulanqab city, Inner Mongolia autonomous region | 2011        | 4HGII                  | KR259941                            |
| RR22                    | Ulanqab city, Inner Mongolia autonomous region | 2011        | 4HGII                  | NM729210                            |
| RR23                    | Ulanqab city, Inner Mongolia autonomous region | 2011        | 4HGII                  | KR259942                            |
| RR25                    | Ulanqab city, Inner Mongolia autonomous region | 2011        | 2-2IIIB                | KR259908                            |
| RR26                    | Ulanqab city, Inner Mongolia autonomous region | 2011        | 4HGII                  | NM729211                            |
| RR27                    | Ulanqab city, Inner Mongolia autonomous region | 2011        | 4HGII                  | KR259943                            |
| R1(12)                  | Qiqihar city, Heilongjiang province            | 2012        | 2-2IV                  | KR259910                            |
| R2(12)                  | Qiqihar city, Heilongjiang province            | 2012        | 3 PT                   | KR259912                            |
| R3(12)                  | Urumqi city, Xinjiang Uygur autonomous region  | 2012        | 4HGI                   | KR259913                            |
| R4(12)                  | Qiqihar city, Heilongjiang province            | 2012        | 4HGI                   | NM729116                            |
| R5(12)                  | Urumqi city, Xinjiang Uygur autonomous region  | 2012        | 4HGI                   | NM729117                            |
| R6(12)                  | Harbin city, Heilongjiang province             | 2012        | 4HGI                   | KR259915                            |
| RHB-1                   | Zhangjiakou city, Hebei province               | 2013        | 4HGII                  | KR259936                            |
| RHB-2                   | Zhangjiakou city, Hebei province               | 2013        | 4HGII                  | NM729205                            |
| RHB-3                   | Zhangjiakou city, Hebei province               | 2013        | 4HGII                  | NM729206                            |
| RHB-4                   | Zhangjiakou city, Hebei province               | 2013        | 4HGII                  | KR259937                            |
| RHL1                    | Qiqihar city, Heilongjiang province            | 2013        | 4HGI                   | KR259919                            |
| RHL2                    | Qiqihar city, Heilongjiang province            | 2013        | 4HGI                   | NM729123                            |
| RHL3                    | Qiqihar city, Heilongjiang province            | 2013        | 4HGI                   | NM729124                            |
| RHL4                    | Qiqihar city, Heilongjiang province            | 2013        | 4HGI                   | NM729125                            |
| RHL5                    | Qiqihar city, Heilongjiang province            | 2013        | 4HGI                   | NM729126                            |
| RHL6                    | Qiqihar city, Heilongjiang province            | 2013        | 4HGI                   | KR259920                            |
| RNM-1                   | Ulanqab city, Inner Mongolia autonomous region | 2013        | 4HGI                   | NM729175                            |
| RNM-2                   | Ulanqab city, Inner Mongolia autonomous region | 2013        | 4-HGII                 | KR259938                            |
| RNM-3                   | Ulanqab city, Inner Mongolia autonomous region | 2013        | 4HGI                   | KR259923                            |
| RNM-4                   | Ulanqab city, Inner Mongolia autonomous region | 2013        | 2-2IIIB                | KR259900                            |
| RNM-5                   | Ulanqab city, Inner Mongolia autonomous region | 2013        | 2-2IIIB                | NM729106                            |
| RNM-7                   | Ulanqab city, Inner Mongolia autonomous region | 2013        | 2-2IIIB                | NM729107                            |
| RNM-8                   | Ulanqab city, Inner Mongolia autonomous region | 2013        | 2-2IIIB                | NM729108                            |
| RNM-9                   | Ulanqab city, Inner Mongolia autonomous region | 2013        | 2-2IIIB                | KR259901                            |
| RSX-1                   | Datong city, Shanxi province                   | 2013        | 4HGI                   | KR259926                            |
| RSX-2                   | Datong city, Shanxi province                   | 2013        | 4HGI                   | NM729177                            |
| RSX-3                   | Datong city, Shanxi province                   | 2013        | 4HGI                   | KR259927                            |

**Table S2.** (Continued from preceding page).

| <b>Isolate code</b> | <b>Sampling site <sup>z</sup></b>                | <b>Year</b> | <b>AG <sup>y</sup></b> | <b>GenBank accession number</b> |
|---------------------|--------------------------------------------------|-------------|------------------------|---------------------------------|
| RSX-5               | Datong city, Shanxi province                     | 2013        | 4HGI                   | NM729179                        |
| RSX-4               | Datong city, Shanxi province                     | 2013        | 4HGI                   | NM729178                        |
| RSX-6               | Datong city, Shanxi province                     | 2013        | 4HGI                   | NM729180                        |
| RSX-7               | Datong city, Shanxi province                     | 2013        | 4HGI                   | KR259928                        |
| RX-1                | Changji city, Xinjiang Uygur autonomous region   | 2013        | 4HGI                   | KR259929                        |
| RX-2                | Changji city, Xinjiang Uygur autonomous region   | 2013        | 4HGII                  | KR259944                        |
| RX-3                | Changji city, Xinjiang Uygur autonomous region   | 2013        | 4HGI                   | NM729181                        |
| RX-4                | Changji city, Xinjiang Uygur autonomous region   | 2013        | 4HGI                   | KR259930                        |
| RX-5                | Changji city, Xinjiang Uygur autonomous region   | 2013        | 4HGI                   | NM729182                        |
| RX6                 | Changji city, Xinjiang Uygur autonomous region   | 2013        | 4HGI                   | NM729183                        |
| RX7                 | Changji city, Xinjiang Uygur autonomous region   | 2013        | 4HGI                   | NM729184                        |
| RX8                 | Changji city, Xinjiang Uygur autonomous region   | 2013        | 4HGI                   | NM729185                        |
| RX9                 | Changji city, Xinjiang Uygur autonomous region   | 2013        | 4HGI                   | NM729186                        |
| RX10                | Changji city, Xinjiang Uygur autonomous region   | 2013        | 4HGI                   | KR259931                        |
| RX11                | Shihezi city, Xinjiang Uygur autonomous region   | 2013        | 4HGI                   | NM729187                        |
| RX12                | Shihezi city, Xinjiang Uygur autonomous region   | 2013        | 4HGI                   | NM729188                        |
| RX13                | Shihezi city, Xinjiang Uygur autonomous region   | 2013        | 4HGI                   | NM729189                        |
| RX14                | Shihezi city, Xinjiang Uygur autonomous region   | 2013        | 4HGI                   | NM729190                        |
| RX15                | Shihezi city, Xinjiang Uygur autonomous region   | 2013        | 4HGI                   | NM729191                        |
| RX16                | Shihezi city, Xinjiang Uygur autonomous region   | 2013        | 4HGI                   | NM729192                        |
| RX17                | Shihezi city, Xinjiang Uygur autonomous region   | 2013        | 4HGI                   | KR259932                        |
| RN5                 | Ulanqab city, Inner Mongolia autonomous region   | 2014        | 4HGI                   | KR259922                        |
| RN6                 | Ulanqab city, Inner Mongolia autonomous region   | 2014        | 2-2IIIB                | NM729037                        |
| RN10                | Chifeng city, Inner Mongolia autonomous region   | 2014        | 2-2IIIB                | KR259899                        |
| RXJ3                | Shihezi city, Xinjiang Uygur autonomous region   | 2014        | 4HGI                   | NM729204                        |
| RHL9                | Qiqihar city, Heilongjiang province              | 2015        | 4HGI                   | NM729127                        |
| RHL10               | Qiqihar city, Heilongjiang province              | 2015        | 4HGI                   | NM729128                        |
| RHL11               | Qiqihar city, Heilongjiang province              | 2015        | 4HGI                   | NM729129                        |
| RHL17               | Qiqihar city, Heilongjiang province              | 2015        | 4HGI                   | NM729130                        |
| RN11                | Ulanqab city, Inner Mongolia autonomous region   | 2015        | 4HGIII                 | NM729212                        |
| RN15                | Ulanqab city, Inner Mongolia autonomous region   | 2015        | 2-2IIIB                | NM729038                        |
| RN17                | Ulanqab city, Inner Mongolia autonomous region   | 2015        | K                      | NM729213                        |
| RN19                | Ulanqab city, Inner Mongolia autonomous region   | 2015        | K                      | NM729214                        |
| RN20                | Ulanqab city, Inner Mongolia autonomous region   | 2015        | 4HGI                   | NM729131                        |
| RN21                | Ulanqab city, Inner Mongolia autonomous region   | 2015        | 4HGI                   | NM729132                        |
| RN22                | Ulanqab city, Inner Mongolia autonomous region   | 2015        | 4HGI                   | NM729133                        |
| RN23                | Ulanqab city, Inner Mongolia autonomous region   | 2015        | 4HGI                   | NM729134                        |
| RN25                | Ulanqab city, Inner Mongolia autonomous region   | 2015        | 4HGI                   | NM729135                        |
| RN28                | Hinggan league, Inner Mongolia autonomous region | 2015        | 2-2IIIB                | NM729039                        |
| RN29                | Hinggan league, Inner Mongolia autonomous region | 2015        | 2-2IIIB                | NM729040                        |

**Table S2.** (Continued from preceding page).

| <b>Isolate<br/>code</b> | <b>Sampling site <sup>z</sup></b>                | <b>Year</b> | <b>AG <sup>y</sup></b> | <b>GenBank<br/>accession number</b> |
|-------------------------|--------------------------------------------------|-------------|------------------------|-------------------------------------|
| RN31                    | Hinggan league, Inner Mongolia autonomous region | 2015        | 2-IIIB                 | NM729041                            |
| RN39                    | Hinggan league, Inner Mongolia autonomous region | 2015        | 2-IIIB                 | NM729042                            |
| RN43                    | Hinggan league, Inner Mongolia autonomous region | 2015        | 2-IIIB                 | NM729043                            |
| RN44                    | Hinggan league, Inner Mongolia autonomous region | 2015        | 2-IIIB                 | NM729044                            |
| RN49                    | Hinggan league, Inner Mongolia autonomous region | 2015        | 2-IIIB                 | NM729045                            |
| RN50                    | Hinggan league, Inner Mongolia autonomous region | 2015        | 2-IIIB                 | NM729046                            |
| RN53                    | Hinggan league, Inner Mongolia autonomous region | 2015        | 2-IIIB                 | NM729047                            |
| RN56                    | Hinggan league, Inner Mongolia autonomous region | 2015        | 2-IIIB                 | NM729048                            |
| RN57                    | Hinggan league, Inner Mongolia autonomous region | 2015        | 2-IIIB                 | NM729049                            |
| RN60                    | Hinggan league, Inner Mongolia autonomous region | 2015        | 2-IIIB                 | NM729050                            |
| RN61                    | Hinggan league, Inner Mongolia autonomous region | 2015        | 2-IIIB                 | NM729051                            |
| RN62                    | Hinggan league, Inner Mongolia autonomous region | 2015        | 2-IIIB                 | NM729052                            |
| RN63                    | Hinggan league, Inner Mongolia autonomous region | 2015        | 2-IIIB                 | NM729053                            |
| RN65                    | Hinggan league, Inner Mongolia autonomous region | 2015        | 2-IIIB                 | NM729054                            |
| RN66                    | Hinggan league, Inner Mongolia autonomous region | 2015        | 2-IIIB                 | NM729055                            |
| RN67                    | Hinggan league, Inner Mongolia autonomous region | 2015        | 2-IIIB                 | NM729056                            |
| RN69                    | Hinggan league, Inner Mongolia autonomous region | 2015        | 2-IIIB                 | NM729057                            |
| RN72                    | Hinggan league, Inner Mongolia autonomous region | 2015        | 2-IIIB                 | NM729058                            |
| RN74                    | Hinggan league, Inner Mongolia autonomous region | 2015        | 2-IIIB                 | NM729059                            |
| RN76                    | Hinggan league, Inner Mongolia autonomous region | 2015        | 2-IIIB                 | NM729060                            |
| RN78                    | Chifeng city, Inner Mongolia autonomous region   | 2015        | 4HGI                   | NM729136                            |
| RN79                    | Chifeng city, Inner Mongolia autonomous region   | 2015        | 4HGI                   | NM729137                            |
| RN80                    | Chifeng city, Inner Mongolia autonomous region   | 2015        | 4HGI                   | NM729138                            |
| RN81                    | Chifeng city, Inner Mongolia autonomous region   | 2015        | 4HGI                   | NM729139                            |
| RN82                    | Chifeng city, Inner Mongolia autonomous region   | 2015        | 4HGI                   | NM729140                            |
| RN83                    | Chifeng city, Inner Mongolia autonomous region   | 2015        | 4HGI                   | NM729141                            |
| RN84                    | Chifeng city, Inner Mongolia autonomous region   | 2015        | 4HGI                   | NM729142                            |
| RN85                    | Chifeng city, Inner Mongolia autonomous region   | 2015        | 4HGI                   | NM729143                            |
| RN86                    | Chifeng city, Inner Mongolia autonomous region   | 2015        | 4HGI                   | NM729144                            |
| RN87                    | Chifeng city, Inner Mongolia autonomous region   | 2015        | 4HGI                   | NM729145                            |
| RN88                    | Chifeng city, Inner Mongolia autonomous region   | 2015        | 4HGI                   | NM729146                            |
| RN90                    | Chifeng city, Inner Mongolia autonomous region   | 2015        | 4HGI                   | NM729147                            |
| RN91                    | Chifeng city, Inner Mongolia autonomous region   | 2015        | 2-IIIB                 | NM729061                            |
| RN92                    | Chifeng city, Inner Mongolia autonomous region   | 2015        | 2-IIIB                 | NM729062                            |
| RN94                    | Chifeng city, Inner Mongolia autonomous region   | 2015        | 2-IIIB                 | NM729063                            |
| RN95                    | Chifeng city, Inner Mongolia autonomous region   | 2015        | 2-IIIB                 | NM729064                            |
| RN97                    | Chifeng city, Inner Mongolia autonomous region   | 2015        | 2-IIIB                 | NM729065                            |
| RN98                    | Chifeng city, Inner Mongolia autonomous region   | 2015        | 2-IIIB                 | NM729066                            |
| RN99                    | Chifeng city, Inner Mongolia autonomous region   | 2015        | 2-IIIB                 | NM729067                            |
| RN100                   | Chifeng city, Inner Mongolia autonomous region   | 2015        | 2-IIIB                 | NM729068                            |

**Table S2.** (Continued from preceding page).

| <b>Isolate<br/>code</b> | <b>Sampling site <sup>z</sup></b>              | <b>Year</b> | <b>AG <sup>y</sup></b> | <b>GenBank<br/>accession number</b> |
|-------------------------|------------------------------------------------|-------------|------------------------|-------------------------------------|
| RN102                   | Chifeng city, Inner Mongolia autonomous region | 2015        | 2-IIIB                 | NM729069                            |
| RN104                   | Chifeng city, Inner Mongolia autonomous region | 2015        | 2-IIIB                 | NM729070                            |
| RN105                   | Hohhot city, Inner Mongolia autonomous region  | 2015        | 4HGI                   | NM729148                            |
| RX18                    | Urumqi city, Xinjiang Uygur autonomous region  | 2015        | 4HGI                   | NM729193                            |
| RX19                    | Urumqi city, Xinjiang Uygur autonomous region  | 2015        | 4HGI                   | NM729194                            |
| RX20                    | Urumqi city, Xinjiang Uygur autonomous region  | 2015        | 4HGI                   | NM729195                            |
| RX21                    | Urumqi city, Xinjiang Uygur autonomous region  | 2015        | 4HGI                   | NM729196                            |
| RX22                    | Urumqi city, Xinjiang Uygur autonomous region  | 2015        | 4HGI                   | NM729197                            |
| RX23                    | Urumqi city, Xinjiang Uygur autonomous region  | 2015        | 4HGI                   | NM729198                            |
| RX24                    | Urumqi city, Xinjiang Uygur autonomous region  | 2015        | 4HGI                   | NM729199                            |
| RX25                    | Urumqi city, Xinjiang Uygur autonomous region  | 2015        | 4HGI                   | NM729200                            |
| RX26                    | Urumqi city, Xinjiang Uygur autonomous region  | 2015        | 4HGI                   | NM729201                            |
| RX28                    | Ili city, Xinjiang Uygur autonomous region     | 2015        | 2-IIIB                 | NM729110                            |
| RX29                    | Ili city, Xinjiang Uygur autonomous region     | 2015        | 2-IIIB                 | NM729111                            |
| RX31                    | Urumqi city, Xinjiang Uygur autonomous region  | 2015        | 2-IIIB                 | NM729112                            |
| RX39                    | Changji city, Xinjiang Uygur autonomous region | 2015        | 4HGI                   | NM729202                            |
| RX44                    | Changji city, Xinjiang Uygur autonomous region | 2015        | 4HGI                   | NM729203                            |
| RN106                   | Ulanqab city, Inner Mongolia autonomous region | 2016        | 4HGI                   | NM729149                            |
| RN107                   | Ulanqab city, Inner Mongolia autonomous region | 2016        | 4HGI                   | NM729150                            |
| RN108                   | Ulanqab city, Inner Mongolia autonomous region | 2016        | 4HGI                   | NM729151                            |
| RN109                   | Ulanqab city, Inner Mongolia autonomous region | 2016        | 4HGI                   | NM729152                            |
| RN110                   | Ulanqab city, Inner Mongolia autonomous region | 2016        | 4HGI                   | NM729153                            |
| RN111                   | Ulanqab city, Inner Mongolia autonomous region | 2016        | 4HGI                   | NM729154                            |
| RN112                   | Ulanqab city, Inner Mongolia autonomous region | 2016        | 4HGI                   | NM729155                            |
| RN113                   | Ulanqab city, Inner Mongolia autonomous region | 2016        | 4HGI                   | NM729156                            |
| RN114                   | Ulanqab city, Inner Mongolia autonomous region | 2016        | 2-IIIB                 | NM729071                            |
| RN115                   | Ulanqab city, Inner Mongolia autonomous region | 2016        | 2-IIIB                 | NM729072                            |
| RN116                   | Ulanqab city, Inner Mongolia autonomous region | 2016        | 2-IIIB                 | NM729073                            |
| RN117                   | Ulanqab city, Inner Mongolia autonomous region | 2016        | 2-IIIB                 | NM729074                            |
| RN118                   | Ulanqab city, Inner Mongolia autonomous region | 2016        | 2-IIIB                 | NM729075                            |
| RN119                   | Ulanqab city, Inner Mongolia autonomous region | 2016        | 2-IIIB                 | NM729076                            |
| RN120                   | Ulanqab city, Inner Mongolia autonomous region | 2016        | 2-IIIB                 | NM729077                            |
| RN121                   | Ulanqab city, Inner Mongolia autonomous region | 2016        | 2-IIIB                 | NM729078                            |
| RN122                   | Ulanqab city, Inner Mongolia autonomous region | 2016        | 2-IIIB                 | NM729079                            |
| RN123                   | Chifeng city, Inner Mongolia autonomous region | 2016        | 4HGI                   | NM729157                            |
| RN124                   | Chifeng city, Inner Mongolia autonomous region | 2016        | 4HGI                   | NM729158                            |
| RN125                   | Chifeng city, Inner Mongolia autonomous region | 2016        | 4HGI                   | NM729159                            |
| RN126                   | Chifeng city, Inner Mongolia autonomous region | 2016        | 2-IIIB                 | NM729080                            |
| RN127                   | Chifeng city, Inner Mongolia autonomous region | 2016        | 4HGI                   | NM729160                            |
| RN128                   | Chifeng city, Inner Mongolia autonomous region | 2016        | 4HGI                   | NM729161                            |

**Table S2.** (Continued from preceding page).

| <b>Isolate<br/>code</b> | <b>Sampling site <sup>z</sup></b>              | <b>Year</b> | <b>AG <sup>y</sup></b> | <b>GenBank<br/>accession number</b> |
|-------------------------|------------------------------------------------|-------------|------------------------|-------------------------------------|
| RN129                   | Chifeng city, Inner Mongolia autonomous region | 2016        | 2-IIIB                 | NM729081                            |
| RN130                   | Chifeng city, Inner Mongolia autonomous region | 2016        | 2-IIIB                 | NM729082                            |
| RN131                   | Chifeng city, Inner Mongolia autonomous region | 2016        | 2-IIIB                 | NM729083                            |
| RN132                   | Chifeng city, Inner Mongolia autonomous region | 2016        | 2-IIIB                 | NM729084                            |
| RN133                   | Chifeng city, Inner Mongolia autonomous region | 2016        | 4HGI                   | NM729162                            |
| RN134                   | Chifeng city, Inner Mongolia autonomous region | 2016        | 4HGI                   | NM729163                            |
| RN135                   | Chifeng city, Inner Mongolia autonomous region | 2016        | 4HGI                   | NM729164                            |
| RN136                   | Chifeng city, Inner Mongolia autonomous region | 2016        | 4HGI                   | NM729165                            |
| RN137                   | Chifeng city, Inner Mongolia autonomous region | 2016        | 4HGI                   | NM729166                            |
| RN138                   | Chifeng city, Inner Mongolia autonomous region | 2016        | 4HGI                   | NM729167                            |
| RN139                   | Chifeng city, Inner Mongolia autonomous region | 2016        | 4HGI                   | NM729168                            |
| RN140                   | Chifeng city, Inner Mongolia autonomous region | 2016        | 4HGI                   | NM729169                            |
| RN141                   | Chifeng city, Inner Mongolia autonomous region | 2016        | 4HGI                   | NM729170                            |
| RN142                   | Chifeng city, Inner Mongolia autonomous region | 2016        | 4HGI                   | NM729171                            |
| RN143                   | Chifeng city, Inner Mongolia autonomous region | 2016        | 4HGI                   | NM729172                            |
| RN144                   | Chifeng city, Inner Mongolia autonomous region | 2016        | 4HGI                   | NM729173                            |
| RN145                   | Chifeng city, Inner Mongolia autonomous region | 2016        | 4HGI                   | NM729174                            |
| RN146                   | Ulanqab city, Inner Mongolia autonomous region | 2016        | 2-IIIB                 | NM729085                            |
| RN147                   | Ulanqab city, Inner Mongolia autonomous region | 2016        | 2-IIIB                 | NM729086                            |
| RN148                   | Ulanqab city, Inner Mongolia autonomous region | 2016        | 2-IIIB                 | NM729087                            |
| RN149                   | Ulanqab city, Inner Mongolia autonomous region | 2016        | 2-IIIB                 | NM729088                            |
| RN150                   | Ulanqab city, Inner Mongolia autonomous region | 2016        | 2-IIIB                 | NM729089                            |
| RN151                   | Ulanqab city, Inner Mongolia autonomous region | 2016        | 2-IIIB                 | NM729090                            |
| RN152                   | Ulanqab city, Inner Mongolia autonomous region | 2016        | 2-IIIB                 | NM729091                            |
| RN153                   | Ulanqab city, Inner Mongolia autonomous region | 2016        | 2-IIIB                 | NM729092                            |
| RN154                   | Ulanqab city, Inner Mongolia autonomous region | 2016        | 2-IIIB                 | NM729093                            |
| RN155                   | Ulanqab city, Inner Mongolia autonomous region | 2016        | 2-IIIB                 | NM729094                            |
| RN156                   | Ulanqab city, Inner Mongolia autonomous region | 2016        | 2-IIIB                 | NM729095                            |
| RN157                   | Ulanqab city, Inner Mongolia autonomous region | 2016        | 2-IIIB                 | NM729096                            |
| RN158                   | Ulanqab city, Inner Mongolia autonomous region | 2016        | 2-IIIB                 | NM729097                            |
| RN159                   | Ulanqab city, Inner Mongolia autonomous region | 2016        | 2-IIIB                 | NM729098                            |
| RN160                   | Ulanqab city, Inner Mongolia autonomous region | 2016        | 2-IIIB                 | NM729099                            |
| RN161                   | Ulanqab city, Inner Mongolia autonomous region | 2016        | 2-IIIB                 | NM729100                            |
| RN162                   | Ulanqab city, Inner Mongolia autonomous region | 2016        | 2-IIIB                 | NM729101                            |
| RN163                   | Chifeng city, Inner Mongolia autonomous region | 2016        | 2-IIIB                 | NM729102                            |
| RN164                   | Chifeng city, Inner Mongolia autonomous region | 2016        | 2-IIIB                 | NM729103                            |
| RN165                   | Chifeng city, Inner Mongolia autonomous region | 2016        | 2-IIIB                 | NM729104                            |
| RN166                   | Chifeng city, Inner Mongolia autonomous region | 2016        | 2-IIIB                 | NM729105                            |
| RN167                   | Ulanqab city, Inner Mongolia autonomous region | 2016        | 4HGII                  | NM729207                            |
| RN168                   | Ulanqab city, Inner Mongolia autonomous region | 2016        | 4HGII                  | NM729208                            |

**Table S2.** (Continued from preceding page).

| <b>Isolate<br/>code</b> | <b>Sampling site <sup>z</sup></b>              | <b>Year</b> | <b>AG <sup>y</sup></b> | <b>GenBank<br/>accession number</b> |
|-------------------------|------------------------------------------------|-------------|------------------------|-------------------------------------|
| RN169                   | Ulanqab city, Inner Mongolia autonomous region | 2016        | 4HGII                  | NM729209                            |
| RX46                    | Changji city, Xinjiang Uygur autonomous region | 2016        | 2-2IIIB                | NM729113                            |
| RX47                    | Changji city, Xinjiang Uygur autonomous region | 2016        | 2-2IIIB                | NM729114                            |
| RX48                    | Changji city, Xinjiang Uygur autonomous region | 2016        | 2-2IIIB                | NM729115                            |

**Note:** <sup>z</sup> Geographic origins where the *Rhizoctonia* isolates were collected in China. <sup>y</sup> Anastomosis groups or subgroups of *Rhizoctonia*.
