# Supplementary material for: Anastomosis Groups and Mycovirome of Rhizoctonia Isolates Causing Sugar Beet Root and Crown Rot and Their Sensitivity to Flutolanil, Thifluzamide, and Pencycuron
Source: MDPI journal article supplement (doi:10.3390/jof9050545), 2023-05-09
Supplement: s1 [file s1]

**Table S3.** Assembled sequences of mycoviruses found in *Rhizoctonia* isolates associated with sugar beet root and crown rot and their amino acid (aa) identities to those of viruses described previously.

| Contig ID         | Name of mycovirus <sup>z</sup>                | GenBank<br>accession number | Contig<br>length (nt) | Best match                             | Identity<br>(%, aa) | Genome<br>type | Number of<br>reads | Family             | Number<br>of hosts |
|-------------------|-----------------------------------------------|-----------------------------|-----------------------|----------------------------------------|---------------------|----------------|--------------------|--------------------|--------------------|
| Contig 21663      | Rhizoctonia solani beny-like virus 2 (RsBLV2) | MZ043902                    | 1982                  | Wheat stripe mosaic virus              | 21.44               | +ssRNA         | 53                 | <i>Benyviridae</i> | 10                 |
| Contig 38678      | Rhizoctonia solani beny-like virus 3 (RsBLV3) | MZ043903                    | 1049                  | Rhizoctonia solani beny-like virus 1   | 96.40               | +ssRNA         | 9                  | <i>Benyviridae</i> | 19                 |
| First_Contig 592  | Rhizoctonia solani beny-like virus 4 (RsBLV4) | MZ043904                    | 1325                  | Wheat stripe mosaic virus              | 32.52               | +ssRNA         | 1242               | <i>Benyviridae</i> | 14                 |
| First_Contig 680  | Rhizoctonia solani beny-like virus 5 (RsBLV5) | MZ043905                    | 2258                  | Rice stripe necrosis virus             | 30.58               | +ssRNA         | 1141               | <i>Benyviridae</i> | 13                 |
| First_Contig 796  | Rhizoctonia solani beny-like virus 6 (RsBLV6) | MZ043906                    | 7462                  | Hubei Beny-like virus 1                | 27.20               | +ssRNA         | 88                 | <i>Benyviridae</i> | 5                  |
| Contig 11890      | Rhizoctonia solani hypovirus 5 (RsHV5)        | MZ043907                    | 1185                  | Sclerotium rolfsii hypovirus 8         | 44.39               | +ssRNA         | 209                | <i>Hypoviridae</i> | 3                  |
| Contig 41165      | Rhizoctonia solani hypovirus 6 (RsHV6)        | MZ043908                    | 1673                  | Sclerotinia homoeocarpa hypovirus<br>1 | 33.10               | +ssRNA         | 20                 | <i>Hypoviridae</i> | 1                  |
| First_Contig 2556 | Rhizoctonia solani hypovirus 7 (RsHV7)        | MZ043909                    | 4484                  | Sclerotium rolfsii hypovirus 8         | 34.27               | +ssRNA         | 53                 | <i>Hypoviridae</i> | 3                  |
| Contig 7027       | Rhizoctonia solani hypovirus 8 (RsHV8)        | MZ043910                    | 923                   | Rhizoctonia solani hypovirus 1         | 55.41               | +ssRNA         | 21                 | <i>Hypoviridae</i> | 15                 |
| Contig 98         | Rhizoctonia solani mitovirus 41 (RsMV41)      | MZ043925                    | 2688                  | Rhizoctonia solani mitovirus 31        | 77.00               | +ssRNA         | 126                | <i>Mitoviridae</i> | 12                 |
| Contig 190        | Rhizoctonia solani mitovirus 42 (RsMV42)      | MZ043926                    | 4172                  | Rhizoctonia solani mitovirus 14        | 57.91               | +ssRNA         | 7017               | <i>Mitoviridae</i> | 17                 |
| Contig 195        | Rhizoctonia solani mitovirus 43 (RsMV43)      | MZ043927                    | 3696                  | Epicoccum nigrum mitovirus 1           | 53.20               | +ssRNA         | 1422               | <i>Mitoviridae</i> | 6                  |
| Contig 249        | Rhizoctonia solani mitovirus 44 (RsMV44)      | MZ043928                    | 2659                  | Neofusicoccum parvum mitovirus 1       | 88.52               | +ssRNA         | 18                 | <i>Mitoviridae</i> | 2                  |
| Contig 276        | Rhizoctonia solani mitovirus 45 (RsMV45)      | MZ043929                    | 1990                  | Neofusicoccum parvum mitovirus 1       | 70.05               | +ssRNA         | 317                | <i>Mitoviridae</i> | 9                  |

| Contig 330                                        | Rhizoctonia solani mitovirus 46 (RsMV46) | MZ043930                    | 1035                  | Rhizoctonia cerealis mitovirus      | 87.50               | +ssRNA         | 25                 | <i>Mitoviridae</i> | 3                  |
|---------------------------------------------------|------------------------------------------|-----------------------------|-----------------------|-------------------------------------|---------------------|----------------|--------------------|--------------------|--------------------|
| <b>Table S3.</b> (Continued from preceding page). |                                          |                             |                       |                                     |                     |                |                    |                    |                    |
| Contig ID                                         | Name of mycovirus <sup>z</sup>           | GenBank<br>accession number | Contig<br>length (nt) | Best match                          | Identity<br>(%, aa) | Genome<br>type | Number of<br>reads | Family             | Number<br>of hosts |
| Contig 370                                        | Rhizoctonia solani mitovirus 47 (RsMV47) | MZ043931                    | 3211                  | Macrophomina phaseolina mitovirus 3 | 41.43               | +ssRNA         | 1484               | <i>Mitoviridae</i> | 1                  |
| Contig 466                                        | Rhizoctonia solani mitovirus 48 (RsMV48) | MZ043932                    | 4397                  | Rhizoctonia solani mitovirus 21     | 58.70               | +ssRNA         | 11605              | <i>Mitoviridae</i> | 1                  |
| Contig 468                                        | Rhizoctonia solani mitovirus 49 (RsMV49) | MZ043933                    | 4377                  | Rhizoctonia solani mitovirus 21     | 76.89               | +ssRNA         | 54076              | <i>Mitoviridae</i> | 1                  |
| Contig 508                                        | Rhizoctonia solani mitovirus 50 (RsMV50) | MZ043934                    | 3888                  | Mitovirus sp.                       | 42.71               | +ssRNA         | 1139               | <i>Mitoviridae</i> | 1                  |
| Contig 509                                        | Rhizoctonia solani mitovirus 51 (RsMV51) | MZ043935                    | 3899                  | Mitovirus sp.                       | 43.61               | +ssRNA         | 46                 | <i>Mitoviridae</i> | 3                  |
| Contig 538                                        | Rhizoctonia solani mitovirus 52 (RsMV52) | MZ043936                    | 2552                  | Rhizoctonia solani mitovirus 26     | 84.54               | +ssRNA         | 13                 | <i>Mitoviridae</i> | 2                  |
| Contig 539                                        | Rhizoctonia solani mitovirus 53 (RsMV53) | MZ043937                    | 3034                  | Rhizoctonia solani mitovirus 26     | 85.06               | +ssRNA         | 67                 | <i>Mitoviridae</i> | 1                  |
| Contig 604                                        | Rhizoctonia solani mitovirus 54 (RsMV54) | MZ043938                    | 3669                  | Mitovirus sp.                       | 48.70               | +ssRNA         | 112                | <i>Mitoviridae</i> | 2                  |
| Contig 744                                        | Rhizoctonia solani mitovirus 55 (RsMV55) | MZ043939                    | 1616                  | Macrophomina phaseolina mitovirus 3 | 39.83               | +ssRNA         | 5226               | <i>Mitoviridae</i> | 2                  |
| Contig 801                                        | Rhizoctonia solani mitovirus 56 (RsMV56) | MZ043940                    | 1141                  | Alternaria alternata mitovirus 1    | 78.89               | +ssRNA         | 396                | <i>Mitoviridae</i> | 12                 |
| Contig 851                                        | Rhizoctonia solani mitovirus 57 (RsMV57) | MZ043941                    | 3173                  | Rhizoctonia solani mitovirus 8      | 72.80               | +ssRNA         | 74                 | <i>Mitoviridae</i> | 2                  |
| Contig 997                                        | Rhizoctonia solani mitovirus 58 (RsMV58) | MZ043942                    | 3398                  | Rhizoctonia solani mitovirus 34     | 80.92               | +ssRNA         | 3109               | <i>Mitoviridae</i> | 1                  |
| Contig 1038                                       | Rhizoctonia solani mitovirus 59 (RsMV59) | MZ043943                    | 4011                  | Rhizoctonia solani mitovirus 32     | 70.90               | +ssRNA         | 11127              | <i>Mitoviridae</i> | 1                  |
| Contig 1104                                       | Rhizoctonia solani mitovirus 60 (RsMV60) | MZ043944                    | 3539                  | Epicoccum nigrum mitovirus 1        | 75.54               | +ssRNA         | 92                 | <i>Mitoviridae</i> | 1                  |
| Contig 1212                                       | Rhizoctonia solani mitovirus 61 (RsMV61) | MZ043946                    | 1797                  | Rhizoctonia solani mitovirus 37     | 77.25               | +ssRNA         | 3547               | <i>Mitoviridae</i> | 2                  |

| Contig 1608                                       | Rhizoctonia solani mitovirus 62 (RsMV62) | MZ043947                    | 1144                  | Rhizoctonia solani mitovirus 33     | 58.02               | +ssRNA         | 2912               | <i>Mitoviridae</i> | 6                  |
|---------------------------------------------------|------------------------------------------|-----------------------------|-----------------------|-------------------------------------|---------------------|----------------|--------------------|--------------------|--------------------|
| <b>Table S3.</b> (Continued from preceding page). |                                          |                             |                       |                                     |                     |                |                    |                    |                    |
| Contig ID                                         | Name of mycovirus <sup>z</sup>           | GenBank<br>accession number | Contig<br>length (nt) | Best match                          | Identity<br>(%, aa) | Genome<br>type | Number of<br>reads | Family             | Number<br>of hosts |
| Contig 1830                                       | Rhizoctonia solani mitovirus 63 (RsMV63) | MZ043948                    | 3182                  | Rhizoctonia solani mitovirus 27     | 77.09               | +ssRNA         | 534                | <i>Mitoviridae</i> | 1                  |
| Contig 2377                                       | Rhizoctonia solani mitovirus 64 (RsMV64) | MZ043949                    | 4296                  | Rhizoctonia solani mitovirus 1      | 72.18               | +ssRNA         | 87                 | <i>Mitoviridae</i> | 1                  |
| Contig 3007                                       | Rhizoctonia solani mitovirus 65 (RsMV65) | MZ043950                    | 3757                  | Rhizoctonia solani mitovirus 25     | 62.19               | +ssRNA         | 418                | <i>Mitoviridae</i> | 2                  |
| Contig 3241                                       | Rhizoctonia solani mitovirus 66 (RsMV66) | MZ043951                    | 3530                  | Epicoccum nigrum mitovirus 1        | 85.00               | +ssRNA         | 2123               | <i>Mitoviridae</i> | 2                  |
| Contig 3312                                       | Rhizoctonia solani mitovirus 67 (RsMV67) | MZ043952                    | 2140                  | Neofusicoccum parvum mitovirus 1    | 46.21               | +ssRNA         | 1591               | <i>Mitoviridae</i> | 1                  |
| Contig 3460                                       | Rhizoctonia solani mitovirus 68 (RsMV68) | MZ043953                    | 1122                  | Alternaria alternata mitovirus 1    | 77.35               | +ssRNA         | 1047               | <i>Mitoviridae</i> | 1                  |
| Contig 3465                                       | Rhizoctonia solani mitovirus 69 (RsMV69) | MZ043954                    | 2915                  | Rhizoctonia solani mitovirus 26     | 82.62               | +ssRNA         | 1033               | <i>Mitoviridae</i> | 6                  |
| Contig 4699                                       | Rhizoctonia solani mitovirus 70 (RsMV70) | MZ043955                    | 1910                  | Rhizoctonia solani mitovirus 37     | 86.17               | +ssRNA         | 337                | <i>Mitoviridae</i> | 2                  |
| Contig 10147                                      | Rhizoctonia solani mitovirus 71 (RsMV71) | MZ043959                    | 2937                  | Mitovirus sp.                       | 89.66               | +ssRNA         | 453                | <i>Mitoviridae</i> | 1                  |
| Contig 32231                                      | Rhizoctonia solani mitovirus 72 (RsMV72) | MZ043966                    | 1338                  | Ceratobasidium mitovirus A          | 69.51               | +ssRNA         | 9                  | <i>Mitoviridae</i> | 5                  |
| First_Contig 14                                   | Rhizoctonia solani mitovirus 73 (RsMV73) | MZ043967                    | 2568                  | Macrophomina phaseolina mitovirus 3 | 42.95               | +ssRNA         | 3276               | <i>Mitoviridae</i> | 4                  |
| First_Contig 16                                   | Rhizoctonia solani mitovirus 74 (RsMV74) | MZ043968                    | 1891                  | Rhizoctonia solani mitovirus 21     | 56.37               | +ssRNA         | 1693               | <i>Mitoviridae</i> | 15                 |
| First_Contig 20                                   | Rhizoctonia solani mitovirus 75 (RsMV75) | MZ043969                    | 2621                  | Macrophomina phaseolina mitovirus 3 | 42.97               | +ssRNA         | 4886               | <i>Mitoviridae</i> | 9                  |
| First_Contig 22                                   | Rhizoctonia solani mitovirus 76 (RsMV76) | MZ043970                    | 3021                  | Rhizoctonia solani mitovirus 31     | 76.02               | +ssRNA         | 2396               | <i>Mitoviridae</i> | 17                 |
| First_Contig 24                                   | Rhizoctonia solani mitovirus 77 (RsMV77) | MZ043971                    | 1590                  | Rhizoctonia solani mitovirus 38     | 83.38               | +ssRNA         | 1498               | <i>Mitoviridae</i> | 9                  |

|                 |                                          |          |      |                                  |       |        |       |                    |   |
|-----------------|------------------------------------------|----------|------|----------------------------------|-------|--------|-------|--------------------|---|
| First_Contig 27 | Rhizoctonia solani mitovirus 78 (RsMV78) | MZ043972 | 3564 | Alternaria alternata mitovirus 1 | 80.87 | +ssRNA | 13315 | <i>Mitoviridae</i> | 5 |
|-----------------|------------------------------------------|----------|------|----------------------------------|-------|--------|-------|--------------------|---|

**Table S3.** (Continued from preceding page).

| Contig ID        | Name of mycovirus <sup>z</sup>           | GenBank<br>accession number | Contig<br>length (nt) | Best match                          | Identity<br>(%, aa) | Genome<br>type | Number of<br>reads | Family             | Number<br>of hosts |
|------------------|------------------------------------------|-----------------------------|-----------------------|-------------------------------------|---------------------|----------------|--------------------|--------------------|--------------------|
| First_Contig 40  | Rhizoctonia solani mitovirus 80 (RsMV80) | MZ043974                    | 2633                  | Rhizoctonia solani mitovirus 31     | 71.10               | +ssRNA         | 4424               | <i>Mitoviridae</i> | 8                  |
| First_Contig 65  | Rhizoctonia solani mitovirus 81 (RsMV81) | MZ043975                    | 1198                  | Rhizoctonia solani mitovirus 25     | 54.11               | +ssRNA         | 3978               | <i>Mitoviridae</i> | 12                 |
| First_Contig 78  | Rhizoctonia solani mitovirus 82 (RsMV82) | MZ043976                    | 2782                  | Rhizoctonia solani mitovirus 22     | 51.80               | +ssRNA         | 3020               | <i>Mitoviridae</i> | 2                  |
| First_Contig 139 | Rhizoctonia solani mitovirus 83 (RsMV83) | MZ043977                    | 3833                  | Rhizoctonia solani mitovirus 7      | 70.06               | +ssRNA         | 4744               | <i>Mitoviridae</i> | 12                 |
| First_Contig 203 | Rhizoctonia solani mitovirus 84 (RsMV84) | MZ043978                    | 3287                  | Epicoccum nigrum mitovirus 1        | 47.54               | +ssRNA         | 7275               | <i>Mitoviridae</i> | 3                  |
| First_Contig 219 | Rhizoctonia solani mitovirus 85 (RsMV85) | MZ043979                    | 2295                  | Neofusicoccum parvum mitovirus 1    | 66.33               | +ssRNA         | 1577               | <i>Mitoviridae</i> | 2                  |
| First_Contig 230 | Rhizoctonia solani mitovirus 86 (RsMV86) | MZ043980                    | 1560                  | Alternaria alternata mitovirus 1    | 70.21               | +ssRNA         | 8959               | <i>Mitoviridae</i> | 10                 |
| First_Contig 275 | Rhizoctonia solani mitovirus 87 (RsMV87) | MZ043981                    | 3324                  | Rhizoctonia solani mitovirus 25     | 47.64               | +ssRNA         | 1129               | <i>Mitoviridae</i> | 14                 |
| First_Contig 345 | Rhizoctonia solani mitovirus 88 (RsMV88) | MZ043982                    | 4347                  | Rhizoctonia solani mitovirus 33     | 62.34               | +ssRNA         | 2134               | <i>Mitoviridae</i> | 1                  |
| First_Contig 361 | Rhizoctonia solani mitovirus 89 (RsMV89) | MZ043983                    | 1510                  | Epicoccum nigrum mitovirus 1        | 40.00               | +ssRNA         | 1691               | <i>Mitoviridae</i> | 1                  |
| First_Contig 370 | Rhizoctonia solani mitovirus 90 (RsMV90) | MZ043984                    | 1909                  | Rhizoctonia solani mitovirus 37     | 85.23               | +ssRNA         | 2883               | <i>Mitoviridae</i> | 3                  |
| First_Contig 391 | Rhizoctonia solani mitovirus 91 (RsMV91) | MZ043985                    | 1155                  | Rhizoctonia solani mitovirus 31     | 73.70               | +ssRNA         | 495                | <i>Mitoviridae</i> | 11                 |
| First_Contig 618 | Rhizoctonia solani mitovirus 92 (RsMV92) | MZ043987                    | 1531                  | Macrophomina phaseolina mitovirus 3 | 87.17               | +ssRNA         | 783                | <i>Mitoviridae</i> | 1                  |
| First_Contig 723 | Rhizoctonia solani mitovirus 93 (RsMV93) | MZ043988                    | 1965                  | Rhizoctonia solani mitovirus 22     | 57.20               | +ssRNA         | 176                | <i>Mitoviridae</i> | 1                  |
| First_Contig 740 | Rhizoctonia solani mitovirus 94 (RsMV94) | MZ043989                    | 2473                  | Rhizoctonia solani mitovirus 25     | 45.35               | +ssRNA         | 155                | <i>Mitoviridae</i> | 5                  |

| First_Contig 919                                  | Rhizoctonia solani mitovirus 95 (RsMV95)   | MZ043991                    | 2763                  | Rhizoctonia solani mitovirus 21       | 55.36               | +ssRNA         | 131                | <i>Mitoviridae</i>  | 13                 |
|---------------------------------------------------|--------------------------------------------|-----------------------------|-----------------------|---------------------------------------|---------------------|----------------|--------------------|---------------------|--------------------|
| <b>Table S3.</b> (Continued from preceding page). |                                            |                             |                       |                                       |                     |                |                    |                     |                    |
| Contig ID                                         | Name of mycovirus <sup>z</sup>             | GenBank<br>accession number | Contig<br>length (nt) | Best match                            | Identity<br>(%, aa) | Genome<br>type | Number<br>of reads | Family              | Number<br>of hosts |
| First_Contig 1173                                 | Rhizoctonia solani mitovirus 96 (RsMV96)   | MZ043994                    | 2406                  | Rhizoctonia solani mitovirus 11       | 41.36               | +ssRNA         | 403                | <i>Mitoviridae</i>  | 1                  |
| First_Contig 2276                                 | Rhizoctonia solani mitovirus 98 (RsMV98)   | MZ043997                    | 1152                  | Mitovirus sp.                         | 64.25               | +ssRNA         | 33                 | <i>Mitoviridae</i>  | 1                  |
| First_Contig 4278                                 | Rhizoctonia solani mitovirus 99 (RsMV99)   | MZ043998                    | 2336                  | Rhizoctonia solani mitovirus 23       | 65.01               | +ssRNA         | 106                | <i>Mitoviridae</i>  | 10                 |
| First_Contig 6503                                 | Rhizoctonia solani mitovirus 100 (RsMV100) | MZ044000                    | 1246                  | Rhizoctonia solani mitovirus 38       | 75.52               | +ssRNA         | 581                | <i>Mitoviridae</i>  | 1                  |
| Second_Contig 58                                  | Rhizoctonia solani mitovirus 101 (RsMV101) | MZ044001                    | 2603                  | Macrophomina phaseolina mitovirus 3   | 86.19               | +ssRNA         | 8                  | <i>Mitoviridae</i>  | 1                  |
| Contig 11664                                      | Rhizoctonia solani mitovirus 102 (RsMV102) | MZ044005                    | 3456                  | Sclerotinia sclerotiorum mitovirus 11 | 74.05               | +ssRNA         | 892                | <i>Mitoviridae</i>  | 1                  |
| Contig 163                                        | Rhizoctonia solani mitovirus 103 (RsMV103) | MZ044006                    | 2886                  | Rhizoctonia solani mitovirus 2        | 56.04               | +ssRNA         | 4789               | <i>Mitoviridae</i>  | 1                  |
| Contig 1141                                       | Rhizoctonia solani mitovirus 104 (RsMV104) | MZ044007                    | 3038                  | Rhizoctonia solani mitovirus 25       | 48.38               | +ssRNA         | 10920              | <i>Mitoviridae</i>  | 1                  |
| Contig 1714                                       | Rhizoctonia solani mitovirus 105 (RsMV105) | MZ044008                    | 3723                  | Rhizoctonia solani mitovirus 14       | 52.10               | +ssRNA         | 2204               | <i>Mitoviridae</i>  | 1                  |
| Contig 1113                                       | Rhizoctonia solani narnavirus 1 (RsNV1)    | MZ043945                    | 2273                  | Fusarium poae narnavirus 1            | 30.83               | +ssRNA         | 985                | <i>Narnaviridae</i> | 7                  |
| Contig 8446                                       | Rhizoctonia solani narnavirus 2 (RsNV2)    | MZ043956                    | 1210                  | Alternaria tenuissima narnavirus 1    | 53.66               | +ssRNA         | 653                | <i>Narnaviridae</i> | 6                  |
| Contig 8527                                       | Rhizoctonia solani narnavirus 3 (RsNV3)    | MZ043957                    | 2331                  | Fusarium poae narnavirus 1            | 30.71               | +ssRNA         | 1639               | <i>Narnaviridae</i> | 5                  |
| Contig 8560                                       | Rhizoctonia solani narnavirus 4 (RsNV4)    | MZ043958                    | 2408                  | Alternaria tenuissima narnavirus 1    | 45.55               | +ssRNA         | 20                 | <i>Narnaviridae</i> | 5                  |
| Contig 10382                                      | Rhizoctonia solani narnavirus 5 (RsNV5)    | MZ043960                    | 1444                  | Fusarium poae narnavirus 1            | 28.94               | +ssRNA         | 317                | <i>Narnaviridae</i> | 1                  |
| Contig 11098                                      | Rhizoctonia solani narnavirus 6 (RsNV6)    | MZ043961                    | 1038                  | Fusarium poae narnavirus 1            | 32.98               | +ssRNA         | 19                 | <i>Narnaviridae</i> | 2                  |

| Contig 11100                                      | Rhizoctonia solani narnavirus 7 (RsNV7)            | MZ043962                    | 1803                  | Fusarium poae narnavirus 1                            | 31.72               | +ssRNA         | 92                 | Narnaviridae     | 2                  |
|---------------------------------------------------|----------------------------------------------------|-----------------------------|-----------------------|-------------------------------------------------------|---------------------|----------------|--------------------|------------------|--------------------|
| <b>Table S3.</b> (Continued from preceding page). |                                                    |                             |                       |                                                       |                     |                |                    |                  |                    |
| Contig ID                                         | Name of mycovirus <sup>z</sup>                     | GenBank<br>accession number | Contig<br>length (nt) | Best match                                            | Identity<br>(%, aa) | Genome<br>type | Number<br>of reads | Family           | Number<br>of hosts |
| Contig 15744                                      | Rhizoctonia solani narnavirus 8 (RsNV8)            | MZ043963                    | 1645                  | Fusarium poae narnavirus 1                            | 32.99               | +ssRNA         | 358                | Narnaviridae     | 7                  |
| Contig 19187                                      | Rhizoctonia solani narnavirus 9 (RsNV9)            | MZ043964                    | 2279                  | Fusarium poae narnavirus 1                            | 28.98               | +ssRNA         | 193                | Narnaviridae     | 3                  |
| Contig 26242                                      | Rhizoctonia solani narnavirus 10 (RsNV10)          | MZ043965                    | 1031                  | Alternaria tenuissima narnavirus 1                    | 58.50               | +ssRNA         | 12                 | Narnaviridae     | 1                  |
| First_Contig 569                                  | Rhizoctonia solani narnavirus 11 (RsNV11)          | MZ043986                    | 1914                  | Fusarium poae narnavirus 1                            | 29.81               | +ssRNA         | 317                | Narnaviridae     | 3                  |
| First_Contig 917                                  | Rhizoctonia solani narnavirus 12 (RsNV12)          | MZ043990                    | 2296                  | Fusarium poae narnavirus 1                            | 28.68               | +ssRNA         | 331                | Narnaviridae     | 4                  |
| First_Contig 1098                                 | Rhizoctonia solani narnavirus 13 (RsNV13)          | MZ043992                    | 2235                  | Fusarium poae narnavirus 1                            | 28.29               | +ssRNA         | 117                | Narnaviridae     | 5                  |
| First_Contig 1115                                 | Rhizoctonia solani narnavirus 14 (RsNV14)          | MZ043993                    | 1279                  | Fusarium poae narnavirus 1                            | 35.26               | +ssRNA         | 944                | Narnaviridae     | 2                  |
| First_Contig 1266                                 | Rhizoctonia solani narnavirus 15 (RsNV15)          | MZ043996                    | 2226                  | Fusarium poae narnavirus 1                            | 29.70               | +ssRNA         | 427                | Narnaviridae     | 1                  |
| First_Contig 5037                                 | Rhizoctonia solani narnavirus 16 (RsNV16)          | MZ043999                    | 2406                  | Fusarium poae narnavirus 1                            | 28.96               | +ssRNA         | 381                | Narnaviridae     | 244                |
| Second_Contig 122                                 | Rhizoctonia solani narnavirus 17 (RsNV17)          | MZ044002                    | 1521                  | Fusarium poae narnavirus 1                            | 28.27               | +ssRNA         | 24                 | Narnaviridae     | 1                  |
| Second_Contig 134                                 | Rhizoctonia solani narnavirus 18 (RsNV18)          | MZ044003                    | 1824                  | Fusarium poae narnavirus 1                            | 27.97               | +ssRNA         | 592                | Narnaviridae     | 4                  |
| Contig 43689                                      | Rhizoctonia solani narnavirus 19 (RsNV19)          | MZ044004                    | 1561                  | Fusarium poae narnavirus 1                            | 28.72               | +ssRNA         | 4                  | Narnaviridae     | 1                  |
| First_Contig 1013                                 | Rhizoctonia solani ourmia-like virus 7<br>(RsOLV7) | MZ043911                    | 812                   | Colletotrichum gloeosporioides<br>ourmia-like virus 1 | 34.68               | +ssRNA         | 16421              | Botourmiaviridae | 2                  |
| Contig 3797                                       | Rhizoctonia solani ourmia-like virus 8             | MZ043912                    | 619                   | Rhizoctonia solani ourmia-like                        | 80.00               | +ssRNA         | 37                 | Botourmiaviridae | 9                  |

(RsOLV8)

virus 1

**Table S3.** (Continued from preceding page).

| Contig ID         | Name of mycovirus <sup>z</sup>                                 | GenBank<br>accession number | Contig<br>length (nt) | Best match                                      | Identity<br>(%, aa) | Genome<br>type | Number<br>of reads | Family                | Number<br>of hosts |
|-------------------|----------------------------------------------------------------|-----------------------------|-----------------------|-------------------------------------------------|---------------------|----------------|--------------------|-----------------------|--------------------|
| Contig 2073       | Rhizoctonia solani partitivirus 2 strain beet<br>(RsPV2B CP)   | MZ043916                    | 1754                  | Rhizoctonia solani dsRNA virus 2                | 99.39               | dsRNA          | 1689               | Partitiviridae        | 37                 |
| Contig 3529       | Rhizoctonia solani partitivirus 2 strain beet<br>(RsPV2B RdRp) | MZ043917                    | 1954                  | Rhizoctonia solani dsRNA virus 2                | 99.52               | dsRNA          | 23                 | <i>Partitiviridae</i> | 37                 |
| Contig 3073       | Rhizoctonia solani partitivirus 15 (RsPV15)                    | MZ043918                    | 1884                  | Rhizoctonia solani partitivirus 8               | 67.68               | dsRNA          | 561                | <i>Partitiviridae</i> | 6                  |
| Contig 10837      | Rhizoctonia solani partitivirus 16 (RsPV16)                    | MZ043919                    | 1190                  | Rhizoctonia solani partitivirus 7               | 54.52               | dsRNA          | 59                 | <i>Partitiviridae</i> | 21                 |
| Contig 14473      | Rhizoctonia solani partitivirus 17 (RsPV17)                    | MZ043920                    | 1511                  | Rhizoctonia solani dsRNA virus 3                | 85.77               | dsRNA          | 179                | <i>Partitiviridae</i> | 13                 |
| Contig 14630      | Rhizoctonia solani partitivirus 18 (RsPV18)                    | MZ043921                    | 2011                  | Fusarium solani partitivirus 2                  | 47.52               | dsRNA          | 28                 | <i>Partitiviridae</i> | 10                 |
| Contig 14675      | Rhizoctonia solani partitivirus 19 (RsPV19)                    | MZ043922                    | 930                   | Rhizoctonia solani partitivirus 7               | 49.32               | dsRNA          | 384                | <i>Partitiviridae</i> | 22                 |
| Contig 45845      | Rhizoctonia solani partitivirus 20 (RsPV20)                    | MZ043923                    | 1187                  | Rosellinia necatrix partitivirus 7              | 62.10               | dsRNA          | 47                 | <i>Partitiviridae</i> | 7                  |
| Contig 48291      | Rhizoctonia solani partitivirus 21 (RsPV21)                    | MZ043924                    | 1493                  | Rhizoctonia solani partitivirus 1               | 61.49               | dsRNA          | 31                 | <i>Partitiviridae</i> | 4                  |
| First_Contig 6326 | Rhizoctonia solani negative-stranded virus 7<br>(RsNSV7)       | MZ043915                    | 1238                  | Rhizoctonia solani<br>negative-stranded virus 2 | 73.54               | -ssRNA         | 58                 | unclassified          | 4                  |
| Contig 8654       | Rhizoctonia solani Khurdun virus (RsKV)                        | MZ043901                    | 5522                  | Khurdun virus                                   | 27.09               | -ssRNA         | 337                | unclassified          | 4                  |
| First_Contig 316  | Rhizoctonia solani narna-like virus 1                          | MZ043913                    | 1747                  | Wenling narna-like virus 6                      | 24.72               | unclassified   | 4177               | unclassified          | 1                  |

(RsNLV1)

**Table S3.** (Continued from preceding page).

| Contig ID            | Name of mycovirus <sup>z</sup>                 | GenBank<br>accession number | Contig<br>length (nt) | Best match                 | Identity (%,<br>aa) | Genome type  | Number of<br>reads | Family       | Number<br>of hosts |
|----------------------|------------------------------------------------|-----------------------------|-----------------------|----------------------------|---------------------|--------------|--------------------|--------------|--------------------|
| First_Contig<br>1168 | Rhizoctonia solani narna-like virus 2 (RsNLV2) | MZ043914                    | 1655                  | Wenling narna-like virus 6 | 26.76               | unclassified | 150                | unclassified | 3                  |

**Note:** <sup>z</sup> Letters followed by Arabic numerals in the parentheses represent the abbreviation of the virus.
