# Supplementary material for: Anastomosis Groups and Mycovirome of Rhizoctonia Isolates Causing Sugar Beet Root and Crown Rot and Their Sensitivity to Flutolanil, Thifluzamide, and Pencycuron
Source: MDPI journal article supplement (doi:10.3390/jof9050545), 2023-05-09
Supplement: s1 [file s1]

**Table S1.** The primer pairs used to verify the 105 putative mycoviruses identified in this study and to detect the distribution of them in the 244 tested *Rhizoctonia* isolates.

| Name of mycovirus                    | Sequence of forward primer (5'-3') | Sequence of reward primer (5'-3') |
|--------------------------------------|------------------------------------|-----------------------------------|
| Rhizoctonia solani beny-like virus 2 | TACTTACGCACGGGTGT                  | CACTGGGTTAGGCAGAAAT               |
| Rhizoctonia solani beny-like virus 3 | TAGTCTGCCATCGGTGCG                 | GGGTTGGGCAAGGTTCTG                |
| Rhizoctonia solani beny-like virus 4 | TAAAGAGTTCGGCAGGTC                 | ATGAAAGCGTGGAAGAGG                |
| Rhizoctonia solani beny-like virus 5 | CGTTTCTTTCTCGGGTCA                 | CGTCGTGGAAGTTGCTAG                |
| Rhizoctonia solani beny-like virus 6 | ATGAGCCGATGGGTAGTTC                | AAGGTTTGAGGGTGGGTA                |
| Rhizoctonia solani hypovirus 5       | CGCTCCTCACGGCTCTAT                 | GCAATGTGCCTGCCAGTA                |
| Rhizoctonia solani hypovirus 6       | CCGTTTGCCACTGCTTCC                 | CTCGCCATCTCGCATCCT                |
| Rhizoctonia solani hypovirus 7       | GAACTCGAAAGCGTAAATCA               | CCTATACTGGCTCCAAATGC              |
| Rhizoctonia solani hypovirus 8       | TTACCTTCCTTGCGGCTCTT               | TGTTCTTGGCACGGCTGA                |
| Rhizoctonia solani mitovirus 41      | AACCCAAGACTTTGAGGATC               | ACGAGGATAAAGCACCCA                |
| Rhizoctonia solani mitovirus 42      | CAACTTAGACCTGACCCT                 | TAACTGAATGGCTTTGAC                |
| Rhizoctonia solani mitovirus 43      | GCTATTGTTAGCGGTATTT                | ATTGCGTCCTTATTCAGA                |
| Rhizoctonia solani mitovirus 44      | GGCTGCTAACGCACCATA                 | AAGTCTGTCCGTCGCTGAA               |
| Rhizoctonia solani mitovirus 45      | TAGCCATAAGCCACCATA                 | TCCGAAAGGGAGAAGCAC                |
| Rhizoctonia solani mitovirus 46      | AAATTACCCGAAGATGGT                 | AAGATGAATAGGCTCCCA                |
| Rhizoctonia solani mitovirus 47      | GTCTCACCTGTGGCTTTT                 | GTGTCTGATGCGGTATGT                |
| Rhizoctonia solani mitovirus 48      | TGAGACGCAGACGCAGTA                 | CGGCAGAATCATTAGTAGCT              |
| Rhizoctonia solani mitovirus 49      | CCTGTCTCAAAGGCGTAG                 | TAACGGTTGGAAGTAGGA                |
| Rhizoctonia solani mitovirus 50      | TGTCACGATTCTTACCCT                 | CTCCATCCCATTATTACC                |
| Rhizoctonia solani mitovirus 51      | ACAAGGGATGCCCAAACCT                | TAAAGCGTCCTGCTGTCTG               |
| Rhizoctonia solani mitovirus 52      | GATCAACGAAGCTCACCC                 | CCAGGCGTAGAAGCAGAA                |
| Rhizoctonia solani mitovirus 53      | TTGGGATGGAACAAACGA                 | GTATTGAATTAGCCGCACAG              |
| Rhizoctonia solani mitovirus 54      | AGCACGGAAGGAGATGTT                 | GTTTCAATGGGTCGGTAG                |
| Rhizoctonia solani mitovirus 55      | TTTGTTCATCCTACCCTCT                | CTATAACGCCTGGTCTCTC               |

**Table S1.** (Continued from preceding page).

| Name of mycovirus               | Sequence of forward primer (5'-3') | Sequence of reward primer (5'-3') |
|---------------------------------|------------------------------------|-----------------------------------|
| Rhizoctonia solani mitovirus 56 | AACGGAAGTGTACGATGAG                | CTGCCAGGCTGAAATAAC                |
| Rhizoctonia solani mitovirus 57 | TTTATCCGCAGTCGTTGT                 | GTCAGTGGGTTCCCTATTT               |
| Rhizoctonia solani mitovirus 58 | CCAACAATCCTACCTCCT                 | CTACCGACAACCTTCCAC                |
| Rhizoctonia solani mitovirus 59 | CCACCATCTAATCGTGCA                 | TCTTCAACCGTGACAGGC                |
| Rhizoctonia solani mitovirus 60 | ATTATGTATCTGCCACCC                 | TGCCCTGATTCTTACTCT                |
| Rhizoctonia solani mitovirus 61 | GCTACTGCGGCTTATTCT                 | CGGCGACAAACTCTGTTA                |
| Rhizoctonia solani mitovirus 62 | CCCTGCTGCTTCTTCTTT                 | ATCCTGGTTCTATTCCGTTTA             |
| Rhizoctonia solani mitovirus 63 | CTCCACTGGCTCCATCTA                 | TACTTACTGGGACCTCAC                |
| Rhizoctonia solani mitovirus 64 | AAGAATGCGTGAGTGCTG                 | GAAGATGAGAATCCCGAAGA              |
| Rhizoctonia solani mitovirus 65 | AACCTCTGGACGCTCTTG                 | GTTCTGATTTGGCTTGGC                |
| Rhizoctonia solani mitovirus 66 | GCAACCTATGGGTGCTCT                 | GCATTACCGTTCTTAGCG                |
| Rhizoctonia solani mitovirus 67 | CTAACGACGAAGTAGCAG                 | AAACACTTTGAGGCAGAA                |
| Rhizoctonia solani mitovirus 68 | CAATCTATCCTTGCTCCT                 | CACTTGTGCTACCGAAAT                |
| Rhizoctonia solani mitovirus 69 | ATCAGTTGCGTTGCGATA                 | AAGAGCATTTGCGTCCAG                |
| Rhizoctonia solani mitovirus 70 | GAGTTCCTTGGCACCTTG                 | TACCCGCAGCCTCATCCT                |
| Rhizoctonia solani mitovirus 71 | CTAAAGACGATAACGGAAA                | CCTGATAGGATAGCCACA                |
| Rhizoctonia solani mitovirus 72 | GTTTACAGCAAACCCAAA                 | ATCCCTAACTCCGTCATT                |
| Rhizoctonia solani mitovirus 73 | CCTATGGGAGCGTTTAGC                 | ACCGTTTACCTTCCGTCTT               |
| Rhizoctonia solani mitovirus 74 | ATGGAGGAAGATGTGGAA                 | TACCGAGAAGGAGGGACT                |
| Rhizoctonia solani mitovirus 75 | CAATTAGGAACCGAAAGC                 | AGAGCGGAATGAAAGATC                |
| Rhizoctonia solani mitovirus 76 | CGGGTTTCAAAGGCTGGT                 | ATCTTCTACTGCTACGGGTGT             |
| Rhizoctonia solani mitovirus 77 | AGAGCGTAAACTTTGTGG                 | ACTAACTTGGCTTGGAGA                |
| Rhizoctonia solani mitovirus 78 | GCTATCGCTAAGTGAGTA                 | TTTGGGTCAGTTAAGTTATG              |
| Rhizoctonia solani mitovirus 80 | AATTCCGTAATGCGAGAA                 | TAATAAATGTCACCGCTTGT              |

**Table S1.** (Continued from preceding page).

| Name of mycovirus                | Sequence of forward primer (5'-3') | Sequence of reward primer (5'-3') |
|----------------------------------|------------------------------------|-----------------------------------|
| Rhizoctonia solani mitovirus 81  | CATCGGGCTAATAAGACA                 | GCACTATCCCAGACCAAA                |
| Rhizoctonia solani mitovirus 82  | CGGAGGTAGAGTGGCTAA                 | TCTGCGGTATGCTCAAAT                |
| Rhizoctonia solani mitovirus 83  | GTACTCGGAAGCGTCATC                 | TCTCGCACAAAGTGGTCTG               |
| Rhizoctonia solani mitovirus 84  | GAGCAATGCCAAACGATG                 | AGCACGGAAGGAGATGTA                |
| Rhizoctonia solani mitovirus 85  | CTCGGAACGGTCAGAGTG                 | CGAAGTAACCAGGGAAGT                |
| Rhizoctonia solani mitovirus 86  | ACCCACCACTGGATTGTTC                | GCTGTCATTACACCGCTTAG              |
| Rhizoctonia solani mitovirus 87  | AAGAAGAAGCAGCAGGGA                 | GCCATAGCCGTTACAAGC                |
| Rhizoctonia solani mitovirus 88  | ATAAATGGCCCAACAAAG                 | TCAACAATCCTCGCTCTG                |
| Rhizoctonia solani mitovirus 89  | CCCTTATGCTCGGTTTAG                 | GGACGGGATAGGACAACA                |
| Rhizoctonia solani mitovirus 90  | TAGATGGTTAGGCAGTCA                 | AGCATAAAGCCCAGTGTA                |
| Rhizoctonia solani mitovirus 91  | GAGTATTAGGAGGGTTGC                 | TTATTCAGAGCCCCTTTA                |
| Rhizoctonia solani mitovirus 92  | GGAACGAACCGAGGAGTT                 | CAGCGAAAGCGAGATACAC               |
| Rhizoctonia solani mitovirus 93  | GCTTCGCCGTCTAACAAG                 | CCATACATCGCTCCACAG                |
| Rhizoctonia solani mitovirus 94  | GGGTCCAACGCATACTCT                 | TCCTCCATCATCCCAAAC                |
| Rhizoctonia solani mitovirus 95  | AGAGCGAAAGTTCCAAAT                 | AGCCAACATAGACCAAAG                |
| Rhizoctonia solani mitovirus 96  | TAAGTGCCGCTACTGATA                 | TTCTGAAGGCTGATGTAA                |
| Rhizoctonia solani mitovirus 98  | CAATCTATTCAATCTCCCT                | TCTTCGGTAATGTCTGTG                |
| Rhizoctonia solani mitovirus 99  | CATTTTCGTTTCATCCAGAC               | AATAGCGACAACCCTTAC                |
| Rhizoctonia solani mitovirus 100 | TGAAGGTAGTCGGATTGG                 | GGGGATGCTAAGGAGATA                |
| Rhizoctonia solani mitovirus 101 | AAGAAGCGGCAGGTAAAG                 | AAAAGCGAGACCACGATG                |
| Rhizoctonia solani mitovirus 102 | CTCCCTTGTGCCTGAGTA                 | GACGGTGTATCCCTATGC                |
| Rhizoctonia solani mitovirus 103 | CCTATTCTCGCTCATTTA                 | GTTCTACCGTTATCCTCTG               |
| Rhizoctonia solani mitovirus 104 | TTAGTGGACGAGGCGATA                 | CAAGAGGACTGGAGGGAC                |
| Rhizoctonia solani mitovirus 105 | CGTCTCGCATAGACTCAAA                | CCACGTTACGAATCCCTC                |

**Table S1.** (Continued from preceding page).

| Name of mycovirus                                    | Sequence of forward primer (5'-3') | Sequence of reward primer (5'-3') |
|------------------------------------------------------|------------------------------------|-----------------------------------|
| Rhizoctonia solani narnavirus 1                      | TGGTTTCTCGGCTGATGT                 | GACGCTGATACTCCTCCC                |
| Rhizoctonia solani narnavirus 2                      | ACTTTCGTTAGTGGGTCTC                | GTCCAGTACAAGCGGTATG               |
| Rhizoctonia solani narnavirus 3                      | GCCTTCACTCCGTAGATT                 | CCACTTACCTCCCTGCTC                |
| Rhizoctonia solani narnavirus 4                      | ATGCCACATTTAAGCATCCACT             | CCGTCACGAAAGCCAGGTC               |
| Rhizoctonia solani narnavirus 5                      | GTGGATGCCAACGCAATT                 | ACGCAGTCGGGAAGAACG                |
| Rhizoctonia solani narnavirus 6                      | GCTGAGCAAGGGAATAAG                 | TCCAGTAGGCAATGAGGT                |
| Rhizoctonia solani narnavirus 7                      | TTATTCGGCGGATTTGTC                 | GTGAAGCACCTCCCAGTT                |
| Rhizoctonia solani narnavirus 8                      | GGATAGGCAGAGGGTCAGTA               | TTGTTGGGATAGTAGGTGTCA             |
| Rhizoctonia solani narnavirus 9                      | CTTCGTCTCCACCTCACC                 | GTCCTGGGCTCATACTCAA               |
| Rhizoctonia solani narnavirus 10                     | GTCAAGGAGCCTGGTAAA                 | GTCTCGCCGTATTCTGGT                |
| Rhizoctonia solani narnavirus 11                     | CACGTTGTGCAGGTATGA                 | CACTTATTGCCTTGTTTCG               |
| Rhizoctonia solani narnavirus 12                     | GGACCTTATTGGGCTATCT                | TAACGGTTTGCTCTTCTTT               |
| Rhizoctonia solani narnavirus 13                     | TGAAACACGTACCCAAGC                 | GGTCCAACCTCAATGCCTAA              |
| Rhizoctonia solani narnavirus 14                     | CGACTTACGACCTTACCC                 | CGACAAATCTGCCGAATA                |
| Rhizoctonia solani narnavirus 15                     | TGCTTTACAGTCCACGATT                | CATTATGCGATAGCCAGTC               |
| Rhizoctonia solani narnavirus 16                     | CACGGATATGACCCTACCTC               | ACGATTAGACCGACTGGC                |
| Rhizoctonia solani narnavirus 17                     | TCTTCTCGGTCAGGTTGC                 | ATCCTATCGGTCGCTTTC                |
| Rhizoctonia solani narnavirus 18                     | GCTAACGACCCGACTCAA                 | CGTAATCGCCCTCACAGT                |
| Rhizoctonia solani narnavirus 19                     | GCAAAGAAGGAGGTCGTAAT               | ACCGTGAGTGGGAGAAAT                |
| Rhizoctonia solani ourmia-like virus 7               | CGGAGGTAGAGTGGCTAA                 | TCTGCGGTATGCTCAAAT                |
| Rhizoctonia solani ourmia-like virus 8               | CCCGTCCACTCATTCTCC                 | TTACGATCCGTGACTTACCC              |
| Rhizoctonia solani partitivirus 2 strain beet (CP)   | GAGTGAGCGGAGGAAAGG                 | TCAACAGCATCGCAAACG                |
| Rhizoctonia solani partitivirus 2 strain beet (RdRp) | GCCATCTGAACGCTATTA                 | GAAAGCACGCAACCCTAC                |
| Rhizoctonia solani partitivirus 15                   | TCATCACTTGACGGGTAG                 | ATCTCCGATACTGGCACA                |

**Table S1.** (Continued from preceding page).

| <b>Name of mycovirus</b>                     | <b>Sequence of forward primer (5'-3')</b> | <b>Sequence of reward primer (5'-3')</b> |
|----------------------------------------------|-------------------------------------------|------------------------------------------|
| Rhizoctonia solani partitivirus 16           | TCCATTGCGTGTCCAGTT                        | CGAATGCGAAATCTCCTC                       |
| Rhizoctonia solani partitivirus 17           | AGGCGGTGACGGAATACA                        | ACACTCTTCGTGCCCAAC                       |
| Rhizoctonia solani partitivirus 18           | TCCGCAAGTAAATGTGAC                        | TTTCATCAATGGGTGTCG                       |
| Rhizoctonia solani partitivirus 19           | AGTCTTCACTTGTGCGGTAA                      | CTCTGGGAATGGGTTTGC                       |
| Rhizoctonia solani partitivirus 20           | CTTTCGCCATCCTCCTCG                        | TTCAAAGCCTGACGCTCC                       |
| Rhizoctonia solani partitivirus 21           | GGGGTCCGTATCTGTGAA                        | AAGGAAATAGCACGAGGC                       |
| Rhizoctonia solani negative-stranded virus 7 | AAGCGTTTATTGTCTTTGTC                      | ATAGCCTTCCTGTGGTCC                       |
| Rhizoctonia solani Khurdun virus             | GTCAGCCCAGGACATCAA                        | GGCAAGTCCGTGAACAAA                       |
| Rhizoctonia solani narna-like virus 1        | CACGGTTGCTCACGACTA                        | GAAGCGAATCCCAATCCA                       |
| Rhizoctonia solani narna-like virus 2        | TGGCGAAGACCAGAGGAGA                       | TGGAACGGAGCCCAATAC                       |
